# Supplementary material for: A confidence interval analysis of sampling effort, sequencing depth, and taxonomic resolution of fungal community ecology in the era of high-throughput sequencing
Source: PLOS journal article supplement (doi:10.1371/journal.pone.0189796), 2017-12-18
Supplement: S2 (10.1371/journal.pone.0189796.s002) [file journal.pone.0189796.s002]

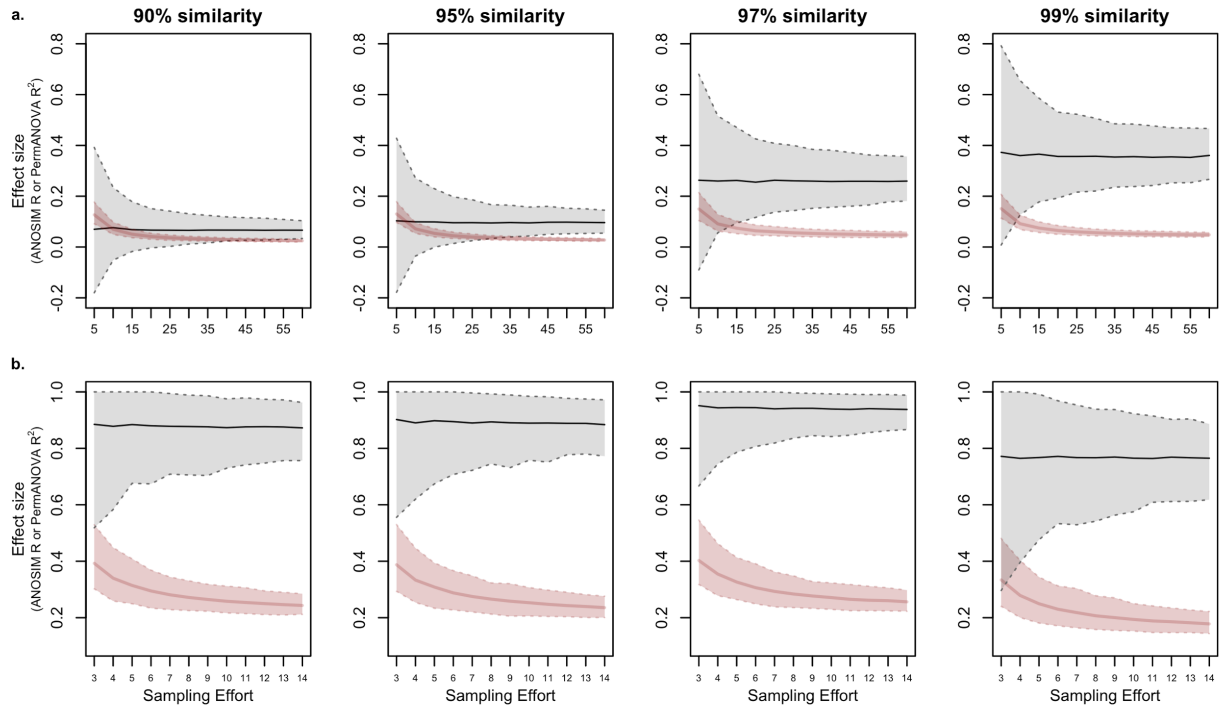

**S2 Fig. Effect of sampling effort on estimates of ANOSIM R and PerMANOVA  $R^2$  effect sizes and 95% confidence intervals.** Sampling effort represents random subsamples of each comparison group with replacement. ANOSIM R (grey) and PerMANOVA  $R^2$  (red) values were calculated with Jaccard dissimilarity and 95% confidence interval based on 1000 subsamples. Jaccard indices were calculated with CSS normalized OTU tables. a) Comparison of FFE communities between bases and tips of *P. taeda* needles at five-sample intervals from five to 60 samples each. b) Comparison of FFE communities between *P. torreyana* needles between different geographic locations (Santa Rosa and San Diego, CA) at one-sample intervals from three to 14 samples each.
