# Supplementary material for: A confidence interval analysis of sampling effort, sequencing depth, and taxonomic resolution of fungal community ecology in the era of high-throughput sequencing
Source: PLOS journal article supplement (doi:10.1371/journal.pone.0189796), 2017-12-18
Supplement: S5 (10.1371/journal.pone.0189796.s005) [file journal.pone.0189796.s005]

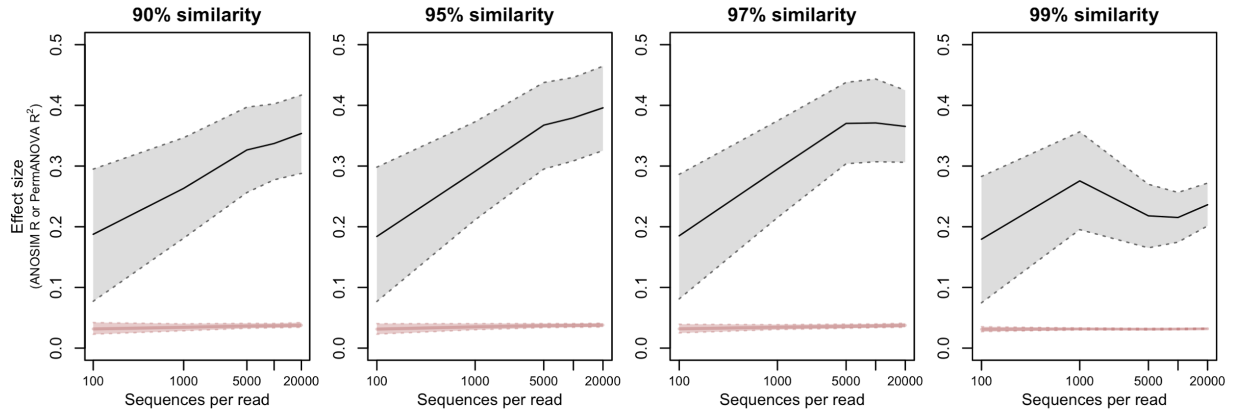

**S5 Fig. Effect of sequencing depths on estimates of geographic community dissimilarity and 95% confidence intervals for FFE communities that differ in geography.** FFE communities between nine *P. taeda* plots across varying distances (1 - 107 km) were compared. ANOSIM R (grey) and PerMANOVA R<sup>2</sup> (red) values were calculated with Jaccard dissimilarity and 95% confidence interval based on 1000 subsamples. Sequencing depth tested at 100, 1000, 5000, 10000, 20000. X-axes are on a log-scale. Dotted lines indicate 95% confidence interval. Solid lines indicate the mean.
